# Supplementary material
Source: ML conference proceedings conference paper supplement (https://proceedings.neurips.cc/paper_files/paper/2010/hash/c2626d850c80ea07e7511bbae4c76f4b-Abstract.html)
Supplement: Supplementary file [file c2626d850c80ea07e7511bbae4c76f4b-Supplemental.zip]

## A Supplementary material: Proofs

Before proving Theorems 1 and 2, we provide some preliminary results presented sections A.1 and A.2

### A.1 Tail inequalities for vector-valued martingales

We need the following result about vector-valued martingales, extracted from [12].

**Lemma 1.** *Let  $(\mathcal{F}_k; k \geq 0)$  be a filtration,  $(m_k; k \geq 0)$  be an  $\mathbb{R}^d$ -valued stochastic process adapted to  $(\mathcal{F}_k)$ ,  $(\eta_k; k \geq 1)$  be a real-valued martingale difference process adapted to  $(\mathcal{F}_k)$ . Assume that  $\eta_k$  is conditionally sub-Gaussian in the sense that there exists some  $R > 0$  such that for any  $\gamma \geq 0$ ,  $k \geq 1$ ,*

$$\mathbb{E}[\exp(\gamma \eta_k) | \mathcal{F}_{k-1}] \leq \exp\left(\frac{\gamma^2 R^2}{2}\right) \quad \text{a.s.} \quad (9)$$

*Consider the martingale  $\xi_t = \sum_{k=1}^t m_{k-1} \eta_k$  and the process  $M_t = \sum_{k=1}^t m_{k-1} m'_{k-1}$ . Assume that with probability one the smallest eigenvalue of  $M_d$  is lower bounded by some positive constant  $\lambda_0$  and that  $\|m_k\|_2 \leq c_m$  holds a.s. for any  $k \geq 0$ .*

*The following hold true: Let*

$$\kappa = \sqrt{3 + 2 \log(1 + 2c_m^2/\lambda_0)}. \quad (10)$$

*For any  $x \in \mathbb{R}^d$ ,  $0 < \delta \leq 1/e$ ,  $t \geq \max(d, 2)$ , with probability at least  $1 - \delta$ ,*

$$|x' \xi_t| \leq \kappa R \sqrt{2 \log t} \sqrt{\log(1/\delta)} \|x\|_{M_t}. \quad (11)$$

*Further, for any  $0 < \delta < \min(1, d/e)$ ,  $t \geq \max(d, 2)$ , with probability at least  $1 - \delta$ ,*

$$\|\xi_t\|_{M_t^{-1}} \leq \kappa R \sqrt{2 d \log t} \sqrt{\log(d/\delta)}. \quad (12)$$

The proof of (11) is based on an exponential inequality of [16] and is adopted from that of Lemma B.4 of [17]. Given (11), inequality (12) follows by some algebra from (11).

*Proof.* In order to prove (11), we shall use Corollary 2.2 of [16] which states the following: Pick some random variables  $A$  and  $B \geq 0$  such that

$$\mathbb{E} \left[ \exp \left\{ \gamma A - \frac{\gamma^2}{2} B^2 \right\} \right] \leq 1 \quad \text{for all } \gamma \in \mathbb{R}. \quad (13)$$

Then, for all  $c \geq \sqrt{2}$ , and all  $y > 0$ ,

$$\mathbb{P} \left( |A| \geq c \sqrt{(B^2 + y) \left( 1 + \frac{1}{2} \log \left( \frac{B^2}{y} + 1 \right) \right)} \right) \leq \exp \left\{ -\frac{c^2}{2} \right\}. \quad (14)$$

We apply this inequality to the random variables  $A = x' \xi_t / R$  and  $B = \|x\|_{M_t}$ , where  $x \in \mathbb{R}^d$  is some fixed vector. We first check if the so-defined  $A, B$  satisfy (13). Pick any  $\gamma \in \mathbb{R}$ . We first study  $\gamma A - (\gamma B)^2 / 2$ . We have

$$\gamma A - (\gamma B)^2 / 2 = \frac{\gamma x' \xi_t}{R} - \frac{\gamma^2 x' M_t x}{2} = \sum_{k=1}^t D_k,$$

where

$$D_k = \frac{\gamma}{R} x' m_{k-1} \eta_k - \frac{\gamma^2}{2} x' m_{k-1} m'_{k-1} x = \frac{\gamma}{R} x' m_{k-1} \eta_k - \frac{\gamma^2}{2} (x' m_{k-1})^2.$$

Now, observe that thanks to (9),  $\mathbb{E}[\exp(D_k) | \mathcal{F}_{k-1}] \leq 1$ . Let  $P_k = \exp(D_k)$ . Noting that  $P_k$  is  $\mathcal{F}_k$ -adapted,

$$\begin{aligned} \mathbb{E}[\exp(\gamma A - \gamma B^2 / 2)] &= \mathbb{E}[P_1 \cdots P_{t-1} P_t] \\ &= \mathbb{E}[\mathbb{E}[P_1 \cdots P_{t-1} P_t | \mathcal{F}_{t-1}]] = \mathbb{E}[P_1 \cdots P_{t-1} \mathbb{E}[P_t | \mathcal{F}_{t-1}]] \\ &\leq \mathbb{E}[\mathbb{E}[P_1 \cdots P_{t-1} | \mathcal{F}_{t-2}]] = \mathbb{E}[P_1 \cdots P_{t-2} \mathbb{E}[P_{t-1} | \mathcal{F}_{t-2}]] \\ &\vdots \\ &\leq \mathbb{E}[\mathbb{E}[P_1 | \mathcal{F}_0]] \leq 1 \end{aligned}$$

which finishes the verification of (13). Now, choose  $y = \lambda_0 \|x\|_2^2$  to get from (14) that for all  $0 < \delta \leq 1/e, t \geq 1$ , with probability  $1 - \delta$ ,

$$|x' \xi_t| \leq R \sqrt{\left( \|x\|_{M_t}^2 + \lambda_0 \|x\|_2^2 \right) \left( 1 + \frac{1}{2} \log \left( 1 + \frac{\|x\|_{M_t}^2}{\lambda_0 \|x\|_2^2} \right) \right)} \sqrt{2 \log \left( \frac{1}{\delta} \right)}. \quad (15)$$

Noting that for  $t \geq \max(d, 2)$ ,  $\lambda_0 \|x\|_2^2 \leq \|x\|_{M_t}^2 \leq t \|x\|_2^2 c_m^2$ , we have  $\|x\|_{M_t}^2 + \lambda_0 \|x\|_2^2 \leq 2 \|x\|_{M_t}^2$  and  $1 + \frac{1}{2} \log \left( 1 + \frac{\|x\|_{M_t}^2}{\lambda_0 \|x\|_2^2} \right) \leq 1 + \frac{1}{2} \log \left( 1 + \frac{t c_m^2}{\lambda_0} \right) \leq \kappa^2 \log(t)/2$ , thanks to the definition of  $\kappa$ . Indeed, it is easy to verify that the slope of function  $1 + \frac{1}{2} \log(1 + c_m^2 t / \lambda_0)$  is below that of  $\kappa^2 \log(t)/2$  for any  $t \geq 1$  provided that  $\kappa \geq 1$ . Hence, the last inequality holds if it holds true for  $t = 2$ , which, after reordering the terms gives the constraint

$$\kappa \geq \sqrt{\frac{2 + \log(1 + 2c_m^2/\lambda_0)}{\log 2}}.$$

Upper bounding  $2/\log 2$  by 3 and  $1/\log 2$  by 2, we get the definition of  $\kappa$ , which indeed satisfies  $\kappa \geq 1$ .

Hence, when (15) holds, it also holds that

$$|x' \xi_t| \leq \kappa R \|x\|_{M_t} \sqrt{\log(t)} \sqrt{2 \log \left( \frac{1}{\delta} \right)}. \quad (16)$$

which is exactly (11).

Now, let us turn to proving (12). Denote by  $S_t$  the symmetric, positive definite matrix such that  $S_t^2 = M_t$  and, for all  $1 \leq i \leq d$ , let  $\mathbf{e}_i$  be the  $i^{\text{th}}$  unit vector (i.e., for all  $j \neq i$ ,  $\mathbf{e}_{ij} = 0$  and  $\mathbf{e}_{ii} = 1$ ). Noting that the identity matrix can be written as  $I = \sum_{i=1}^d \mathbf{e}_i \mathbf{e}_i'$ , we have  $\|\xi_t\|_{M_t^{-1}}^2 = \xi_t' M_t^{-1} \xi_t = \xi_t' S_t^{-1} I S_t^{-1} \xi_t = \sum_{i=1}^d \xi_t' S_t^{-1} \mathbf{e}_i \mathbf{e}_i' S_t^{-1} \xi_t$ . Therefore, for any constant  $\tau > 0$ ,

$$\begin{aligned} \mathbb{P} \left[ \|\xi_t\|_{M_t^{-1}}^2 \geq d\tau^2 \right] &= \mathbb{P} \left[ \sum_{i=1}^d \xi_t' S_t^{-1} \mathbf{e}_i \mathbf{e}_i' S_t^{-1} \xi_t \geq d\tau^2 \right] \leq \sum_{i=1}^d \mathbb{P} \left[ \xi_t' S_t^{-1} \mathbf{e}_i \mathbf{e}_i' S_t^{-1} \xi_t \geq \tau^2 \right] \\ &\leq \sum_{i=1}^d \mathbb{P} \left[ |\xi_t' S_t^{-1} \mathbf{e}_i| \geq \tau \right]. \end{aligned}$$

Applying (11) with  $x = S_t^{-1} \mathbf{e}_i$ , and  $\tau = \kappa R \|S_t^{-1} \mathbf{e}_i\|_{M_t} \sqrt{\log(t)} \sqrt{2 \log \left( \frac{d}{\delta} \right)}$ ,  $0 < \delta < \min(1, d/e)$ ,  $t \geq \max(d, 2)$ , and using the fact that  $\|S_t^{-1} \mathbf{e}_i\|_{M_t} = 1$ , we have

$$\mathbb{P} \left[ \|\xi_t\|_{M_t^{-1}}^2 \geq 2d\kappa^2 R^2 \log(t) \log \left( \frac{d}{\delta} \right) \right] \leq \delta,$$

thus, finishing the proof.  $\square$

**Remark 1.** Note that if  $\eta_k \in [\alpha_k - R, \alpha_k + R]$  holds almost surely for some  $\mathcal{F}_{k-1}$ -measurable random variable  $\alpha_k$  then, using Hoeffding's lemma (see, e.g., Lemma A.1 of [3]), we get that for all  $\gamma \in \mathbb{R}$ ,

$$\mathbb{E} \left[ \exp \{ \gamma \eta_k \} \mid \mathcal{F}_{k-1} \right] \leq \exp \{ \gamma \mathbb{E} [\eta_k \mid \mathcal{F}_{k-1}] \} \exp \left\{ \frac{4R^2 \gamma^2}{8} \right\} = \exp \left\{ \frac{\gamma^2 R^2}{2} \right\},$$

showing that  $(\eta_k)$  satisfies the sub-Gaussian conditions (9). In particular, this holds if  $|\eta_k| \leq R$  holds almost surely.

## A.2 A bound on the prediction error

In this section we prove some bounds on the error of predicting the mean-rewards.

We start with the following result:

**Proposition 1.** *Take any  $\delta$ ,  $t$  such that  $0 < \delta < \min(1, d/e)$ ,  $1 + \max(d, 2) \leq t \leq T$ . Let  $\tilde{A}_t$  be any  $\mathbf{A}$ -valued random variable. Let*

$$\beta_t^a(\delta) = \frac{2 k_\mu \kappa R_{\max}}{c_\mu} \|m_a\|_{M_t^{-1}} \sqrt{2 d \log t} \sqrt{\log(d/\delta)}, \quad (17)$$

where  $\kappa$  is defined by (10). Then, with probability at least  $1 - \delta$ , it holds that

$$\left| \mu(m'_{\tilde{A}_t} \theta_*) - \mu(m'_{\tilde{A}_t} \tilde{\theta}_t) \right| \leq \beta_t^{\tilde{A}_t}(\delta).$$

*Proof.* Pick a time  $t$  such that  $d + 1 \leq t \leq T$  and an action  $a \in \mathbf{A}$ . We start with bounding  $\left| \mu(m'_a \theta_*) - \mu(m'_a \tilde{\theta}_t) \right|$ . Since  $\mu$  is Lipschitz, we have  $|\mu(m'_a \theta_*) - \mu(m'_a \tilde{\theta}_t)| \leq k_\mu |m'_a(\theta_* - \tilde{\theta}_t)|$ . By Assumption 1,  $\nabla g_t$  is continuous,<sup>5</sup> hence, by the Fundamental Theorem of Calculus,

$$g_t(\theta_*) - g_t(\tilde{\theta}_t) = G_t(\theta_* - \tilde{\theta}_t),$$

where

$$G_t = \int_0^1 \nabla g_t(s\theta_* + (1-s)\tilde{\theta}_t) ds.$$

Now, for any  $\theta \in \Theta$ ,  $\nabla g_t(\theta) = \sum_{k=1}^{t-1} m_{A_k} m'_{A_k} \dot{\mu}(m'_{A_k} \theta)$ . Therefore, thanks to Assumption 1, we have  $G_t \succeq c_\mu M_t \succeq c_\mu M_d \succ 0$ , where in the last step we used that the first  $d$  actions are such that  $M_d \succeq \lambda_0 I \succ 0$ . Thus,  $G_t$  is positive definite and, hence, it is also non-singular. Therefore,

$$\left| \mu(m'_a \theta_*) - \mu(m'_a \tilde{\theta}_t) \right| \leq k_\mu \left| m'_a G_t^{-1} (g_t(\theta_*) - g_t(\tilde{\theta}_t)) \right|.$$

Since  $G_t^{-1}$  is also positive definite, we get

$$\left| \mu(m'_a \theta_*) - \mu(m'_a \tilde{\theta}_t) \right| \leq k_\mu \|m_a\|_{G_t^{-1}} \|g_t(\theta_*) - g_t(\tilde{\theta}_t)\|_{G_t^{-1}}. \quad (18)$$

Since  $G_t \succeq c_\mu M_t$  implies that  $G_t^{-1} \preceq c_\mu^{-1} M_t^{-1}$ ,  $\|x\|_{G_t^{-1}} \leq \frac{1}{\sqrt{c_\mu}} \|x\|_{M_t^{-1}}$  holds for arbitrary  $x \in \mathbb{R}^d$ . Hence,

$$\left| \mu(m'_a \theta_*) - \mu(m'_a \tilde{\theta}_t) \right| \leq \frac{k_\mu}{c_\mu} \|m_a\|_{M_t^{-1}} \|g_t(\theta_*) - g_t(\tilde{\theta}_t)\|_{M_t^{-1}}.$$

Now,

$$\begin{aligned} \|g_t(\theta_*) - g_t(\tilde{\theta}_t)\|_{M_t^{-1}} &\leq \|g_t(\theta_*) - g_t(\hat{\theta}_t)\|_{M_t^{-1}} + \|g_t(\hat{\theta}_t) - g_t(\tilde{\theta}_t)\|_{M_t^{-1}} \\ &\leq 2 \|g_t(\theta_*) - g_t(\hat{\theta}_t)\|_{M_t^{-1}}, \end{aligned}$$

where the first inequality follows from the triangle inequality and second follows since by assumption  $\theta_* \in \Theta$  and because of the optimizing property of  $\hat{\theta}_t$  within  $\Theta$ .

Thanks to the definition of  $\hat{\theta}_t$ , and using  $\epsilon_k = R_k - \mu(m'_{A_k} \theta_*)$ ,  $\xi_t \stackrel{\text{def}}{=} g_t(\hat{\theta}_t) - g_t(\theta_*) = \sum_{k=1}^{t-1} m_{A_k} \epsilon_k$ . Therefore,

$$\left| \mu(m'_a \theta_*) - \mu(m'_a \tilde{\theta}_t) \right| \leq \frac{2 k_\mu}{c_\mu} \|m_a\|_{M_t^{-1}} \|\xi_t\|_{M_t^{-1}}.$$

Since this holds simultaneously for all  $a \in \mathbf{A}$ , it also holds when  $a$  is replaced by any  $\mathbf{A}$ -valued random variable  $\tilde{A}_t$ :

$$\left| \mu(m'_{\tilde{A}_t} \theta_*) - \mu(m'_{\tilde{A}_t} \tilde{\theta}_t) \right| \leq \frac{2 k_\mu}{c_\mu} \|m_{\tilde{A}_t}\|_{M_t^{-1}} \|\xi_t\|_{M_t^{-1}}. \quad (19)$$

<sup>5</sup>For all  $x \in \mathbb{R}^d$ ,  $\nabla g_t(x)$  denotes the Jacobian matrix of  $g_t$  at point  $x$ .

Now, let us use Lemma 1 to bound  $\|\xi_t\|_{M_t^{-1}}$ . Set  $m_k = m_{A_{k+1}}$  ( $k = 0, 1, \dots$ ),  $\eta_k = \epsilon_k$  ( $k = 1, 2, \dots$ ),  $\mathcal{F}_k = \sigma(m_s, \eta_s; s \leq k)$ . Due to Assumption 3,  $\mathbb{E}[\eta_k | \mathcal{F}_{k-1}] = \mathbb{E}[\eta_k | m_{k-1}, \eta_{k-1}, \dots, m_1, \eta_1, m_0] = \mathbb{E}[\epsilon_k | m_{A_k}, \epsilon_{k-1}, \dots, m_{A_2}, \epsilon_1, m_{A_1}] = 0$ . Since by the same assumption,  $|\epsilon_k| \leq R_{\max}$ , we may choose  $R = R_{\max}$  by Remark 1. Further, by Assumption 2,  $\|m_k\|_2 = \|m_{A_{k+1}}\|_2 \leq \max_{a \in \mathcal{A}} \|m_a\|_2 \leq c_m$ , and, by the choice of the first  $d$  actions,  $\sum_{k=1}^d m_{k-1} m'_{k-1} = \sum_{k=1}^d m_{A_k} m'_{A_k} \succeq \lambda_0 I$ . Therefore, all the assumptions of the Lemma are met and we can conclude that for any  $0 < \delta < \min(1, d/e)$ ,  $t \geq 1 + \max(d, 2)$ , with probability at least  $1 - \delta$ ,

$$\|\xi_t\|_{M_t^{-1}} \leq \kappa R_{\max} \sqrt{2d \log t} \sqrt{\log(d/\delta)}, \quad (20)$$

where  $\kappa$  is defined by (10).

By chaining (19) and (20), we get that on the event when (20) holds, we also have

$$\left| \mu(m'_{\tilde{A}_t} \theta_*) - \mu(m'_{\tilde{A}_t} \tilde{\theta}_t) \right| \leq \frac{2k_\mu \kappa R_{\max}}{c_\mu} \|m_{\tilde{A}_t}\|_{M_t^{-1}} \sqrt{2d \log t} \sqrt{\log(d/\delta)},$$

finishing the proof.  $\square$

Proposition 1 implies the following bound on the immediate mean regret:

**Proposition 2.** *For all  $\delta$  such that  $0 < \delta \leq \min(1, 2Td/e)$ , simultaneously for all  $t \in \{1 + \max(d, 2), \dots, T\}$ ,*

$$\mu(m'_{a_*} \theta_*) - \mu(m'_{A_t} \theta_*) \leq 2 \beta_t^{A_t} \left( \frac{\delta}{2T} \right).$$

*holds with probability at least  $1 - \delta$ .*

*Proof.* Fix  $t \in \{1 + \max(d, 2), \dots, T\}$  and let  $\delta$  be as in the statement. Consider the decomposition

$$\begin{aligned} \mu(m'_{a_*} \theta_*) - \mu(m'_{A_t} \theta_*) &= \left( \mu(m'_{a_*} \theta_*) - \mu(m_{a_*} \tilde{\theta}_t) \right) \\ &\quad + \left( \mu(m_{a_*} \tilde{\theta}_t) - \mu(m_{A_t} \tilde{\theta}_t) \right) + \left( \mu(m_{A_t} \tilde{\theta}_t) - \mu(m'_{A_t} \theta_*) \right). \end{aligned}$$

Now, according to Proposition 1, outside of an event of measure bounded by  $\delta/(2T)$ ,

$$\mu(m'_{a_*} \theta_*) - \mu(m'_{a_*} \tilde{\theta}_t) \leq \beta_t^{a_*} (\delta/(2T)).$$

Also, outside of an event of measure bounded by  $\delta/(2T)$ ,

$$\mu(m'_{A_t} \theta_*) - \mu(m'_{A_t} \tilde{\theta}_t) \leq \beta_t^{A_t} (\delta/(2T)).$$

Further, by the definition of  $A_t$ ,

$$\begin{aligned} \mu(m_{a_*} \tilde{\theta}_t) - \mu(m_{A_t} \tilde{\theta}_t) &= \mu(m_{a_*} \tilde{\theta}_t) + \beta_t^{a_*} (\delta/(2T)) - \mu(m_{A_t} \tilde{\theta}_t) - \beta_t^{a_*} (\delta/(2T)) \\ &\leq \mu(m_{A_t} \tilde{\theta}_t) + \beta_t^{A_t} (\delta/(2T)) - \mu(m_{A_t} \tilde{\theta}_t) - \beta_t^{a_*} (\delta/(2T)) \\ &= \beta_t^{A_t} (\delta/(2T)) - \beta_t^{a_*} (\delta/(2T)). \end{aligned}$$

Chaining the inequalities and using a union bound gives the final result.  $\square$

According to the previous proposition, the behavior of the immediate regret at time step  $t$  is bounded by  $2\beta_t^{A_t} (\delta/(2T)) = 2\rho(t) \|m_{A_t}\|_{M_t^{-1}} \leq 2\rho(T) \|m_{A_t}\|_{M_t^{-1}}$ . Therefore, with  $t_0 = 1 + \max(d, 2)$ , outside of an event of probability at most  $\delta$ , we can bound the cumulated regret up to time  $T$  by

$$\text{Regret}_T \leq (t_0 - 1) R_{\max} + \sum_{t=t_0}^T \min \{ \mu(m'_{a_*} \theta_*) - \mu(m'_{A_t} \theta_*), R_{\max} \} \quad (21)$$

$$\leq (t_0 - 1) R_{\max} + 2\rho(T) \sum_{t=t_0}^T \min \{ \|m_{A_t}\|_{M_t^{-1}}, 1 \}, \quad (22)$$

where the last inequality follows from the fact that  $R_{\max} \leq 2\rho(T)$  by definition of  $\rho(T)$ . Note that  $\|m_{A_t}\|_{M_t^{-1}}$  is expected to become small as  $t$  gets large. This motivates us to bound a sum of  $\|m_{A_t}\|_{M_t^{-1}}^2$ . For technical reasons that will become clear later, we bound  $\sum_{t=d}^T \min \left\{ \|m_{A_t}\|_{M_t^{-1}}^2, 1 \right\}$ .

**Proposition 3.** *Let  $t_0 \geq d + 1$ . Then,*

$$\sum_{t=t_0}^T \min \left\{ \|m_{A_t}\|_{M_t^{-1}}^2, 1 \right\} \leq 2d \log \left( \frac{c_m^2 T}{\lambda_0} \right) \quad \text{a.s.}$$

*Proof.* This proof follows the steps of the proof of Lemma 9 of [8]. By the definition of  $M_{t+1}$ , we have

$$\begin{aligned} \det(M_{t+1}) &= \det(M_t + m_{A_t} m_{A_t}') = \det(M_t) \det \left( I + M_t^{-1/2} m_{A_t} (M_t^{-1/2} m_{A_t})' \right) \\ &= \det(M_t) \left( 1 + \|m_{A_t}\|_{M_t^{-1}}^2 \right) = \det(M_{t_0}) \prod_{k=t_0}^t \left( 1 + \|m_{A_k}\|_{M_k^{-1}}^2 \right), \end{aligned}$$

where the last line follows from the fact that  $1 + \|m_{A_t}\|_{M_t^{-1}}^2$  is an eigenvalue of the matrix  $I + M_t^{-1/2} m_{A_t} (M_t^{-1/2} m_{A_t})'$  and that all the other eigenvalues are equal to 1. Thus, using the fact that  $x \leq 2 \log(1 + x)$  which holds for any  $0 \leq x \leq 1$ , we have

$$\begin{aligned} \sum_{t=t_0}^T \min \left\{ \|m_{A_t}\|_{M_t^{-1}}^2, 1 \right\} &\leq 2 \sum_{t=t_0}^T \log \left( 1 + \|m_{A_t}\|_{M_t^{-1}}^2 \right) \\ &= 2 \log \prod_{t=t_0}^T \left( 1 + \|m_{A_t}\|_{M_t^{-1}}^2 \right) \\ &= 2 \log \left( \frac{\det(M_{T+1})}{\det(M_{t_0})} \right). \end{aligned}$$

Note that the trace of  $M_{t+1}$  is upper-bounded by  $t c_m^2$ . Then, since the trace of the positive definite matrix  $M_{t+1}$  is equal to the sum of its eigenvalues and  $\det(M_{t+1})$  is the product of its eigenvalues, we have  $\det(M_{t+1}) \leq (t c_m^2)^d$ . In addition,  $\det(M_{t_0}) \geq \lambda_0^d$  since  $t_0 \geq d + 1$ . Thus,

$$\sum_{t=t_0}^T \min \left\{ \|m_{A_t}\|_{M_t^{-1}}^2, 1 \right\} \leq 2d \log \left( \frac{c_m^2 T}{\lambda_0} \right).$$

□

### A.3 Proof of the Main Theorems

#### A.3.1 Proof of Theorem 1

*Proof.* We start from (21), where  $t_0 = 1 + \max(d, 2)$ . According to the definition of  $\Delta(\theta_*)$  whenever  $A_t$  is a suboptimal action,  $\mu(m'_{a_*} \theta_*) - \mu(m'_{A_t} \theta_*) \geq \Delta(\theta_*)$ , while in the other case we have  $\mu(m'_{a_*} \theta_*) - \mu(m'_{A_t} \theta_*) = 0$ . In both cases, we can write

$$\mu(m'_{a_*} \theta_*) - \mu(m'_{A_t} \theta_*) \leq \frac{(\mu(m'_{a_*} \theta_*) - \mu(m'_{A_t} \theta_*))^2}{\Delta(\theta_*)}.$$

According to Proposition 2, with probability  $1 - \delta$ , simultaneously for all  $t \in \{t_0, \dots, T\}$ ,

$$\mu(m'_{a_*} \theta_*) - \mu(m'_{A_t} \theta_*) \leq 2\beta_t^{A_t} (\delta/(2T)) = 2\rho(t) \|m_{A_t}\|_{M_t^{-1}}.$$

Therefore, on the event when these inequalities holds, we have

$$\begin{aligned} \sum_{t=t_0}^T \min \left\{ \mu(m'_{a_*} \theta_*) - \mu(m'_{A_t} \theta_*), R_{\max} \right\} &\leq \sum_{t=t_0}^T \min \left\{ 4 \frac{\rho(t)^2}{\Delta(\theta_*)} \|m_{A_t}\|_{M_t^{-1}}^2, R_{\max} \right\} \\ &\leq 4 \frac{\rho(T)^2}{\Delta(\theta_*)} \sum_{t=t_0}^T \min \left\{ \|m_{A_t}\|_{M_t^{-1}}^2, 1 \right\}. \end{aligned}$$

where the last inequality follows from the fact that  $\Delta(\theta_*) \leq R_{\max} \leq 4\rho(T)^2/R_{\max}$  and that  $\rho(\cdot)$  is an increasing function. Combining this with the bound of Proposition 3, we get

$$\sum_{t=t_0}^T \min \{ \mu(m'_{a_*} \theta_*) - \mu(m'_{A_t} \theta_*), R_{\max} \} \leq 8d \frac{\rho(T)^2}{\Delta(\theta_*)} \log \left( \frac{c_m^2 T}{\lambda_0} \right).$$

Plugging in the definition of  $\rho(T)$ , we get that it holds with probability  $1 - \delta$  that

$$\begin{aligned} \text{Regret}_T &\leq (t_0 - 1)R_{\max} + \sum_{t=t_0}^T \min \{ \mu(m'_{a_*} \theta_*) - \mu(m'_{A_t} \theta_*), R_{\max} \} \\ &\leq (t_0 - 1)R_{\max} + \frac{32d^2 \kappa^2 R_{\max}^2 k_\mu^2}{c_\mu^2 \Delta(\theta_*)} \log(T) \log(2dT/\delta) \log \left( \frac{c_m^2 T}{\lambda_0} \right). \end{aligned}$$

□

### A.3.2 Proof of Theorem 2

*Proof.* Let  $t_0 = 1 + \max(d, 2)$ . According to Proposition 2, (22) holds with probability  $1 - \delta$ , so it remains to bound

$$\sum_{t=t_0}^T \min \left\{ \|m_{A_t}\|_{M_t^{-1}}, 1 \right\}.$$

Using the Cauchy-Schwarz inequality and Proposition 3, we have

$$\begin{aligned} \sum_{t=t_0}^T \min \left\{ \|m_{A_t}\|_{M_t^{-1}}, 1 \right\} &\leq \sqrt{T} \sqrt{\sum_{t=t_0}^T \min \left\{ \|m_{A_t}\|_{M_t^{-1}}^2, 1 \right\}} \\ &\leq \sqrt{T} \sqrt{2d \log(c_m^2 T/\lambda_0)}. \end{aligned}$$

Combining with (22) and using the definition of  $\rho(\cdot)$  gives

$$\begin{aligned} \text{Regret}_T &\leq (t_0 - 1)R_{\max} + 2\rho(T) \sqrt{2dT \log(c_m^2 T/\lambda_0)} \\ &= (t_0 - 1)R_{\max} + 8d \frac{k_\mu \kappa R_{\max}}{c_\mu} \sqrt{T \log(T) \log(c_m^2 T/\lambda_0) \log(2Td/\delta)} \\ &\leq (d+1)R_{\max} + 8d \frac{k_\mu \kappa R_{\max}}{c_\mu} \log(sT) \sqrt{T \log(2Td/\delta)}, \end{aligned}$$

where  $s = \max \left( \frac{c_m^2}{\lambda_0}, 1 \right)$ , thus, finishing the proof. □
